# Supplementary material for: Seminal Fluid Metabolomic Markers of Oligozoospermic Infertility in Humans
Source: PubMed Central journal article supplement (PMC7074256; doi:10.3390/metabo10020064), 2020-02-11
Supplement: metabolites-10-00064-s001.pdf [file metabolites-10-00064-s001.pdf]

## Supplementary Materials

# Seminal Fluid Metabolomic Markers of Oligozoospermic Infertility in Humans

Federica Murgia<sup>1</sup>, Valentina Corda <sup>2</sup>, Marianna Serrenti<sup>2</sup>, Valeria Usai<sup>2</sup>, Maria Laura Santoru<sup>1</sup>, K. Joseph Hurt<sup>3</sup>, Mauro Passaretti<sup>1</sup>, Maria Carla Monni<sup>2</sup>, Luigi Atzori<sup>1</sup> and Giovanni Monni<sup>2,\*</sup>

<sup>1</sup> Clinical Metabolomics Unit, Department of Biomedical Sciences, University of Cagliari, 09121 Cagliari, Italy; federica.murgia@unica.it (F.M.); marialaurasantoru@gmail.com (M.L.S.); mauro.passaretti@gmail.com (M.P.); latzori@unica.it (L.A.)

<sup>2</sup> Department of Prenatal and Preimplantation Genetic Diagnosis and Fetal Therapy, Ospedale Pediatrico Microcitemico "A.Cao", 09121 Cagliari, Italy; cordavale@hotmail.it (V.C.); mariannaserrenti@tiscali.it (M.S.); valeriau@tiscali.it (V.U.); mariacarlamonni@live.it (M.C.M.)

<sup>3</sup> Divisions of Maternal Fetal Medicine and Reproductive Sciences, Department of Obstetrics and Gynecology, University of Colorado Anschutz Medical Campus, Aurora, CO 80045, USA; k.joseph.hurt@cuanschutz.edu

\* Correspondence: prenatalmonni@tiscali.it

## Material and Method

VIP (Variables Important in the Projection) value referred to the variables and we considered only that having value  $>1$  (a measure of their relative influence on the model). In the projection techniques, a strategy for selecting descriptors is provided by analyzing the weights used to construct the scores. In fact, if the weight of a variable is higher, the variable will have an important effect in the model. Viceversa, if weight approaches zero, the variable will be irrelevant and can be excluded. A useful parameter for the selection are the VIPs. Each variable of block  $x$  is associated with a parameter (VIP) which establishes the influence of that variable on the model. The VIP parameter is calculated by combining the weight that a given variable has in each projection and the explanatory power of that component of the model. The higher VIP indicates the greater influence of the variable on the model. Once a limit has been set (usually 1.0 or 0.80), all descriptors with a lower VIP are eliminated from the constructed model and a new model is calculated. Generally, this selection method improves the qualities of the models in terms of  $Q^2$  making the model more robust in prediction.

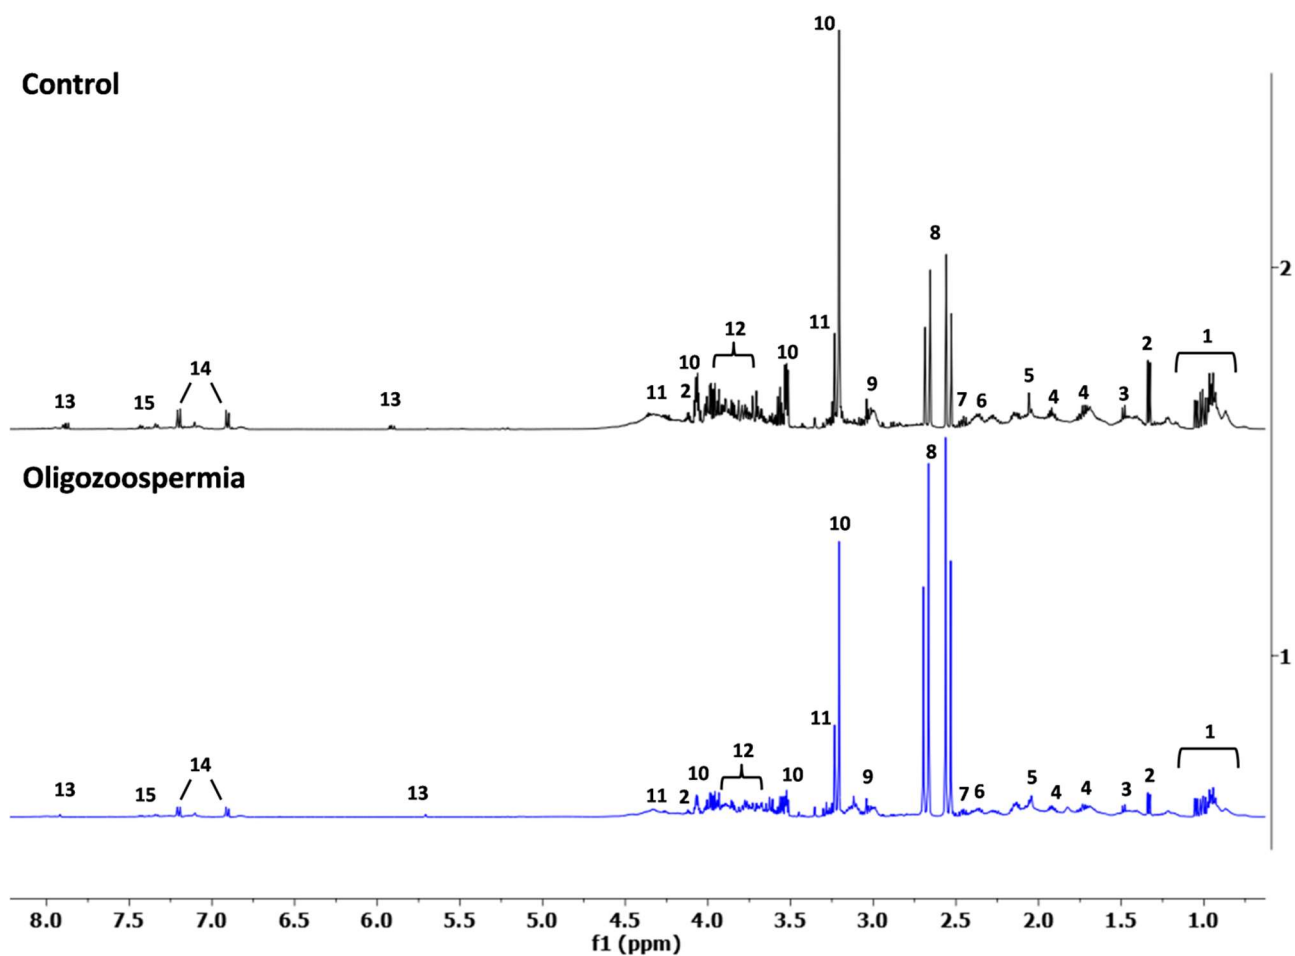

**Figure S1.** Representative 500 MHz one-dimensional  $^1\text{H}$  NMR spectra recorded for seminal plasma samples from a healthy control (black) and a patient with oligozoospermia (blue). The numbers in the figure correspond to the major peaks: 1. Branched Chain Aminoacids; 2. Lactate; 3. Alanine; 4. Lysine; 5. N-Acetyl groups; 6. Glutamate; 7. Glutamine; 8. Citrate; 9. Creatine; 10. Choline; 11. sn-Glycero-3-Phosphocholine; 12. Fructose; 13. Uridine; 14. Tyrosine; 15. Phenylalanine.

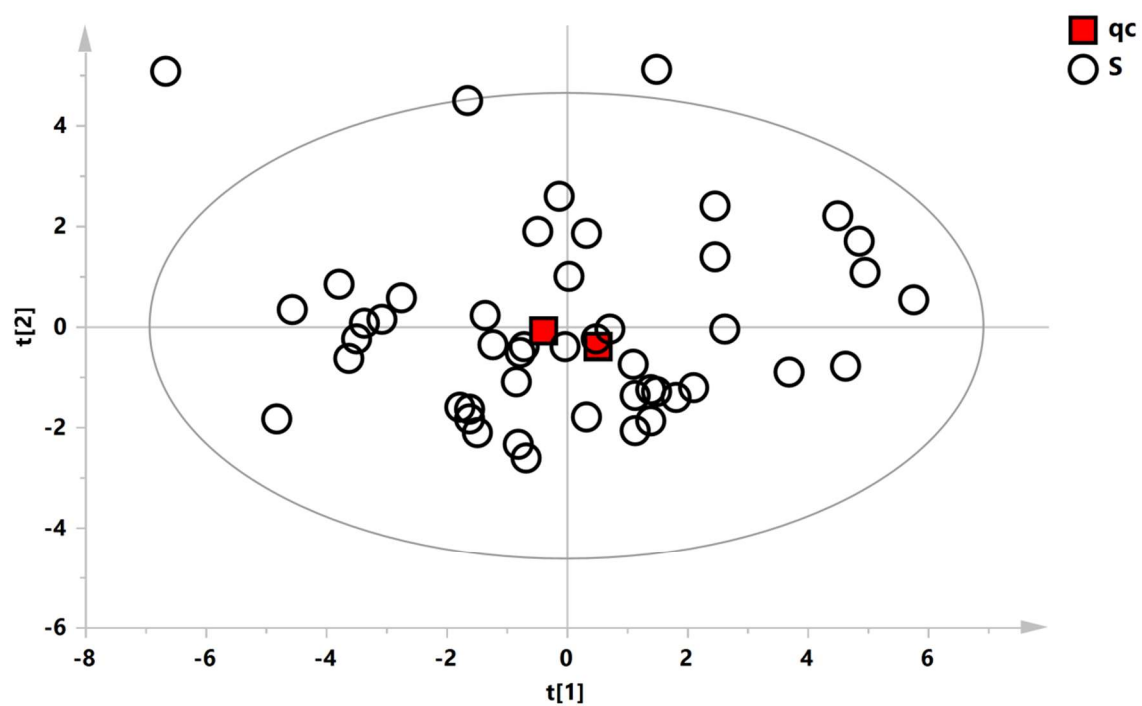

**Figure S2.** PCA model of NMR samples of seminal fluid of control patients and patients affected by oligozoospermia (white circles). Red boxes indicate the QC samples.

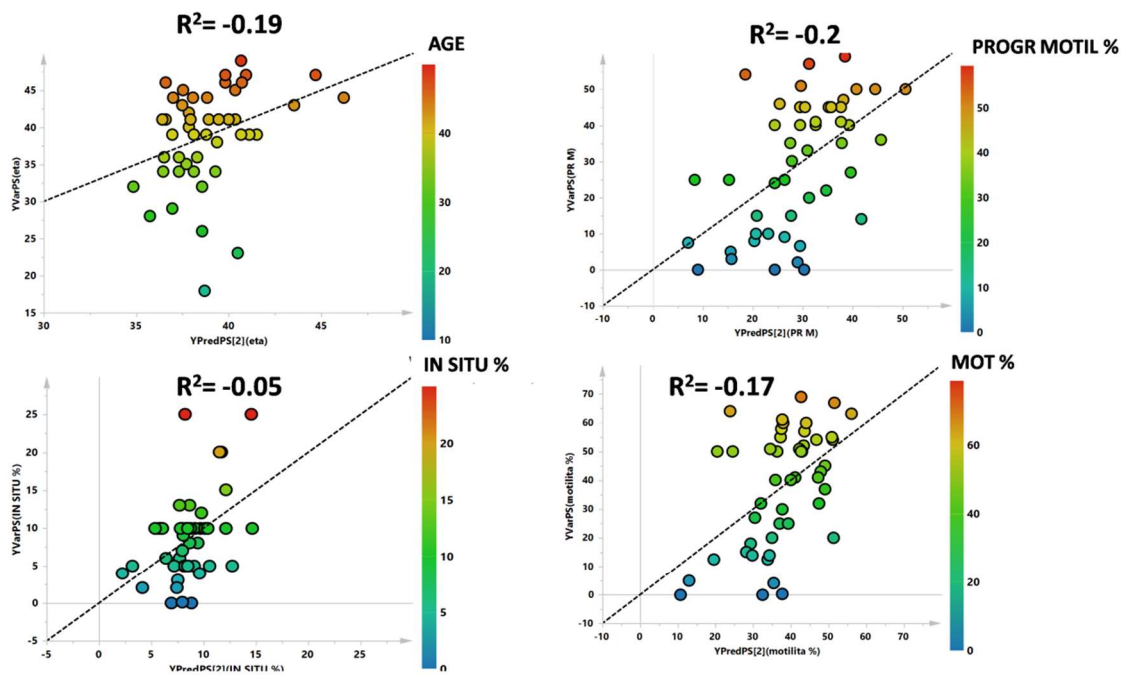

**Figure S3.** PLS correlation analysis between the metabolic profile of the patients and clinical parameters such as age, % of motility of spermatozoa , % progressive motility and % of “in situ” motility. Each point represent a seminal fluid sample of patients.
